2 **Self-management of multimorbidity in sub-Saharan Africa: a systematic review and meta-synthesis**  
3 **with focus on diabetes, hypertension, chronic kidney disease and HIV infection**

4

5 Sangwani Nkhana Salimu\*<sup>1,2</sup>, Melissa Taylor<sup>1¶</sup>, Stephen A Spencer<sup>2¶</sup>, Deborah Nyirenda<sup>2,3</sup>, Nicola  
6 Desmond<sup>3</sup>, Ben Morton<sup>1,2</sup>

7

8 <sup>1</sup> Department of Clinical Sciences, Liverpool School of Tropical Medicine, Liverpool, UK

9 <sup>2</sup> Malawi-Liverpool-Wellcome Programme, Blantyre, Malawi

10 <sup>3</sup> Department of International Public Health, Liverpool School of Tropical Medicine, Liverpool, UK

11

12

13 [\\* Corresponding author: sangwani.salimu@lstm.ac.uk](mailto:sangwani.salimu@lstm.ac.uk)

14 ¶ These authors contributed equally to this work.

15

16 ORCID ID: 0000-0002-7543-8512 (SNS)

17 ORCID ID: 0000-0002-6164-2854 (BM)

18 ORCID ID: 0000-0002-2874-8569 (ND)

19

20

21 **NOTE: This preprint reports new research that has not been certified by peer review and should not be used to guide clinical practice.**

22

23

24 **Abstract**

25 **Background**

26 The increasing prevalence of multimorbidity in sub-Saharan Africa (SSA) is an urgent concern for health  
27 systems delivery. It is uncertain how best to promote self-management approaches or the actions that  
28 patients and carers take to maintain physical and mental health, in this context. This review aims to  
29 identify, critically appraise, and synthesize qualitative evidence that describes self-management of  
30 multimorbidity among patients and their carers in SSA.

31 **Methods**

32 We systematically searched PubMed, MEDLINE, CINAHL Global Health, Google Scholar and grey  
33 literature for studies on self-management of multimorbidity or common individual chronic  
34 diseases (HIV, diabetes, hypertension or chronic kidney disease) in SSA published between 1  
35 January 2000 and 28 to 15<sup>th</sup> September 2024. Using qualitative meta-synthesis techniques to formulate  
36 the questions and synthesize findings. We used a 10-point Critical Appraisal Skills Program (CASP)-  
37 Qualitative-Checklist to assess the quality of the studies and NVivo 12 software to facilitate a thematic  
38 analysis approach.

39 **Results**

40 We screened 2010 articles for inclusion and 20 studies met inclusion criteria. We identified themes  
41 related to medical, diet, emotional and physical self-management activities. Patients negotiate self-  
42 management based on immediacy of needs and available family support. Patients are motivated to  
43 apply biomedical management but are limited by factors such as drug stock-outs and out-of-pocket  
44 expenditure. Limited knowledge and low self-efficacy toward self-management of multimorbidity  
45 impact decision making and problem solving. We found that diabetes mellitus presents the biggest  
46 stressor in terms of burden of treatment; temporal discontinuation of medications is more prevalent  
47 amongst patients with hypertension; and patients with multimorbidity are frequently hypervigilant  
48 about their health, more likely to suffer from stress and to seek healthcare.

49

50

51 **Conclusions**

52 We found that there is relative lack of data on self-management of multimorbidity among patients and  
53 their carers in SSA. Where data exists, we observed significant health literacy gaps, low health literacy  
54 support and limited self-efficacy as barriers to implementation of self-management. Context sensitive  
55 programmes are required to improve health literacy to increase patient autonomy and their toolkit of  
56 options to manage chronic disease.

## 57 **Introduction**

58 Multimorbidity, the presence of two or more long-term conditions (LTCs), is an immediate and  
59 increasing health challenge in low- and middle-income countries (LMICs) (1-3). There are concerns,  
60 however, that this definition does not address the person-centered needs of multimorbidity related to  
61 the complex relationships between patient or carer preferences, priorities, and social context (2, 4, 5).  
62 Despite increasing prevalence of multimorbidity, data on patient and carer health literacy, skills and  
63 engagement are limited in sub-Saharan Africa (SSA) (3, 6). Self-management refers to the actions  
64 individuals and carers take for themselves, their families and others to maintain good physical and  
65 mental health; meet social and psychological needs; and prevent illness deterioration (7-9). This article  
66 aims to evaluate available data on the implementation of self-management strategies for  
67 multimorbidity in SSA.

68 Effective self-management requires partnership with healthcare providers to support patients and  
69 carers to increase health literacy, skills and confidence (7, 8, 10, 11). There are notable differences in  
70 how multimorbidity presents in SSA compared to high-income countries (HIC); people in SSA more  
71 frequently suffer from co-existing chronic non-communicable diseases (NCD) and communicable  
72 diseases such as HIV-infection (3, 12, 13). This fact, combined with limited access to care and poorly  
73 developed pathways for the prevention and management of chronic conditions (14), pose particular  
74 challenges for patients. People living with multimorbidity (PLWMM) must constantly negotiate decisions  
75 related to their illnesses and interactions with healthcare (15-17). Individuals self-reflect and self-  
76 negotiate on pivotal occurrences related to their conditions; when/where to seek care; and what  
77 disease and/or symptoms to prioritize (18, 19). These occurrences function as critical cues or indicators  
78 that may lead to significant changes in an individual's approach to self-care, serving as signals that  
79 prompt a reassessment and potential refinement of their management strategies. The inter-relationship  
80 and recognition of chronic and acute symptoms is a particular challenge in this respect (18, 19). Limited  
81 access to healthcare and high out-of-pocket expenditure exacerbates the challenges for PLWMM in SSA  
82 (16, 20-22). Furthermore, limited or poor-quality interactions with healthcare providers may also  
83 present missed opportunities to improve health literacy and self-management (23).

84 Our aim was to explore existing evidence on the implementation of self-management strategies for  
85 PLWMM, focusing on four common disease combinations (HIV, hypertension, diabetes and chronic  
86 kidney disease [CKD]) in SSA (6, 24). We conducted a systematic literature search and meta-synthesis of

87 primary qualitative papers related to patients living with two or more of these diseases. Lessons drawn  
88 from the review will help inform the development of improved patient-centred self-management  
89 strategies for PLWMM.

90

91

92 **Methods**

93

94 **Design**

95 We conducted a qualitative meta-synthesis focused on patient and carer experiences of living with  
96 multimorbidity, examining current and potential self-management approaches in SSA. The systematic  
97 review protocol was registered in the International Prospective Register of Systematic Reviews  
98 (PROSPERO) database (ID: CRD42021262708). We followed methodological and reporting procedures  
99 for qualitative meta-synthesis as outlined by Sandelowski and Barroso (2007) (25).

100 **Search methods**

101 We conducted a systematic literature search within Medline, CINAHL, and Global Health (25) databases.  
102 Our detailed search terms and strategy are described in Box 1.

103 **Selection of studies**

104 We included: (1) studies that employed a qualitative, or mixed methodology; (2) explored self-  
105 management of multimorbidity among adults ( $\geq 18$  years old) and/or their carers living with HIV, CKD,  
106 diabetes or hypertension or any combination of these diseases; (3) published between January 2000 and  
107 September 2024; and (4) conducted in sub-Saharan Africa. We excluded (1) abstracts and conference  
108 proceedings that were not peer reviewed; (2) studies published in a language other than English; (3)  
109 systematic or literature reviews; and (4) studies focused on palliative procedures.

110 A minimum of two people (SNS, SAS or MT) independently screened titles, abstracts, and full text in turn  
111 for manuscript inclusion. Subsequently, any discrepancies were discussed until consensus was reached  
112 (25). We also screened reference lists of papers included in the article. Eligible papers are summarized in  
113 Table 2.

114

115 **Quality appraisal**

116 We appraised the quality of eligible papers using the 10-item Critical Appraisal Skills Programme (CASP)  
117 checklist for systematic appraisal of qualitative research (26). SNS and SAS appraised papers  
118 independently; discussed discrepancies until they reached consensus or referred to MT for arbitration.  
119 We assessed 10 areas: aim, methodology, research design, ethical considerations, research self-scrutiny,

120 recruitment strategy, data-collection, data-analysis, findings, and study relevance using a 3-point scale  
121 with range 0-1 (1, Yes; 0, No; 0.5, Unclear) for each area. We assigned scores as follows: a weak score,  
122 (0) to articles that offered little to no justification for a particular issue; a moderate score, (0.5), to  
123 articles that addressed the issue but did not fully elaborate (e.g., the justification for using a self-  
124 management strategy was presented but the context itself was not explained) and a strong score, (1), to  
125 articles that extensively justified and explained the issue at hand. Studies that had a combined score  
126 across all areas between 9-10 were designated as high quality. Fourteen studies described clear aims,  
127 utilized appropriate methods, and offered meaningful interpretations indicating strong methodological  
128 rigor and were adjudged to be of high quality (25). See Box 3 for critical appraisal results.

129

## 130 **Analysis**

131 Qualitative data synthesis was conducted using a thematic approach informed by Braun and Clarke,  
132 2006 (27). The first author (SNS) familiarized herself with all the papers through reading and re-reading.  
133 Data analysis involved extraction of raw data including quotes as first order constructs and author  
134 interpretations as second-order constructs. SNS then generated third-order constructs as themes that  
135 represented synthesized interpretations of the data. To increase validity of the synthesis, first order  
136 constructs were conceptualized as key concepts and we then identified quotes that best represented  
137 each second-order construct. Additional abstraction led to development of third-order constructs (new  
138 themes), which were discussed amongst the full team (ND, DN and BM). In line with established  
139 practice, where necessary, we overrode primary researchers' interpretations in favor of direct  
140 participants accounts (28). We explored codes and examined their relationship to each other to identify  
141 themes. Data synthesis was iterative to enhance depth of findings through adding, removing or merging  
142 codes as well as re-analyzing the data upon the emergence of new themes.

143

## 144 **Results**

### 145 **Characteristics of included studies**

146 We screened 2010 papers in the title phase; of these, 62 underwent abstract screening and 20 studies  
147 fulfilled criteria for inclusion (Figure 1: PRISMA flow chart). Studies reported findings from seven  
148 countries: six in South Africa (23, 29-33); five in Malawi (15, 34-37); three in Ghana (38-40) and Liberia

149 (41-43); two from Nigeria (41, 44) and one each from Senegal (45), and Kenya (46). Four papers  
150 purposively recruited PLWMM (15, 23, 34, 47) while twelve studies addressed diabetes (29, 31, 32, 35,  
151 37-39, 42-46). Additionally, two studies covered hypertension (30, 41) and another two covered HIV (33,  
152 34). The methods used included semi-structured in-depth interviews (IDIs) (n = 10) (15, 29, 33, 34, 37,  
153 38, 40, 41, 44, 45); IDIs and observations (n= 3) (23, 31, 46); FGDs (n = 1) (35); IDIs and FGDs (n=3) (30,  
154 32, 47); IDIs, FGDs and observations (n = 1) (39); and photovoice (n=2) (42, 43). Two studies employed  
155 mixed methods (44, 47). Whilst we focused on HIV, diabetes, hypertension and chronic kidney disease,  
156 eight additional chronic conditions were observed and discussed in selected studies. These included:  
157 stroke, gout, asthma, depression, sickle cell anemia, epilepsy and chronic obstructive pulmonary  
158 disease. These conditions were sometimes mentioned in combination with the primary conditions of  
159 interest. Although they are not the focus of our manuscript, their inclusion in the studies reflects their  
160 frequent co-occurrence with the primary conditions, which is crucial for understanding the complexity  
161 of managing multiple chronic diseases. This broader context helps to provide a more comprehensive  
162 view of the challenges associated with multimorbidity.

### 163 **Synthesis of findings**

164 We carried out a meta synthesis review on self-management of multimorbidity among patients living  
165 with a combination of HIV, diabetes, hypertension or chronic kidney disease. We synthesized findings  
166 under four main inductive themes namely: i) medical management; ii) diet management; iii) emotional  
167 management; and iv) physical management.

### 168 **Medical management**

#### 169 **Biomedical treatment is prioritized, but access is limited**

170 The papers reviewed reported high awareness of the need for biomedical treatment among patients  
171 and carers. Commonly practiced medical management strategies include active search for medical  
172 information (15, 39); maintenance of medical appointments and drug adherence (23, 31, 32, 35, 39-41,  
173 46-48); self-monitoring (15, 39, 40, 42, 44, 46); and avoidance of trigger factors, for example wearing  
174 tight shoes for diabetic patients (31, 36, 40). Biomedical management of chronic conditions was  
175 considered central towards optimal disease control, even more so when implemented alongside dietary  
176 and spiritual management (15, 23, 29-32, 34, 35, 39, 43, 45, 49). Patients living with diabetes fear  
177 serious consequences of hypoglycemia or hyperglycemia and claim increased treatment compliance



178 than the other diseases (39). PLWMM are more likely to implement biomedical management to prevent  
179 secondary complications (31, 34, 39, 49).

180 *"I am always afraid of low blood sugar because I have experienced it on several occasions. I go*  
181 *about with cube sugar in case of sudden low blood sugar. I also take cola drink whenever I have*  
182 *low blood sugar which I do with caution to avoid elevated blood sugar level'. (FGD 4, 48-year-old*  
183 *Civil servant) (44).*

184 *"BP (hypertension) is dangerous because if people have not gone to the hospital, they may suffer*  
185 *a stroke or lose the use of some limbs or even die. Sometimes we hear of people just dying*  
186 *without getting sick," (male, 58, 13 years on ARTs, never misses ARTs- also antihypertensive).*

187 *"...I also have diabetes, and I spend most of my savings on going to the chemist to check my*  
188 *blood sugar level...I was admitted last month for hyperglycemic coma so the doctor said I should*  
189 *be checking my blood sugar every weekend..." (Patient living with hypertension and diabetes)*  
190 *(41).*

191 Patients living with singular disease experience more treatment satisfaction compared to PLWMM,  
192 reflections on treatment effectiveness relate to initiation of treatment and were directly linked to  
193 reduced distress and improved functionality (15, 34, 37, 47).

194 *"Before I started taking my medication my heart could beat faster. In the case of diabetes,*  
195 *before I had knowledge of it I couldn't cultivate (farm) because I felt very weak and I couldn't*  
196 *figure it out that it was due to diabetes, but after I started taking medication now I can cultivate*  
197 *for long time [ . . . ] unlike before," Female, 55 diabetes and hypertension (15).*

198 *". . .the time when I did not know of my status. . .I was very sick not expecting to be alive up to*  
199 *date like the way I am.... I was not able to eat, to talk to anyone, or even to sit like this, no! I*  
200 *could only sleep and maybe do my toilet right where I was. But just after I started taking my*  
201 *medicine. . .I see that I am getting much better. . .," IDI Female, HIV (47).*

202 *"A lot has changed in my life because at first, I did not have good health like this. My life was*  
203 *tough because I was suffering a lot and lost weight but when I got diagnosed and initiated on*  
204 *treatment I have seen great improvement in my general health and I have even gained more*  
205 *weight than before I started treatment," Man, diabetic (37).*

206 Post initiation of treatment, most PLWMM observe and monitor how their bodies function living with  
207 disease (23, 29, 32, 39, 40, 44, 47). Patients living with HIV comorbidity are more likely to pay attention  
208 to the other disease than the HIV as many perceive their HIV to be well-managed (23, 29, 30, 32, 39, 40,  
209 47). Again, symptom recognition related to diabetes or hypertension is a more complicated process than  
210 in HIV. This may also demonstrate that patient experiences of comorbidity may be more subjective or  
211 prolonged for diabetes, hypertension and chronic kidney disease than for HIV itself.

212

### 213 **Rationing drug supply as a strategy to manage access to drugs**

214 Medication stock-outs and high costs were reported in all studies (15, 23, 29-32, 34, 35, 38-40, 44-47).  
215 Regular drug stockouts likely indicate that shortage of medication for chronic conditions in SSA is a  
216 regional challenge. Patients and their carers negotiate such challenges in multiple ways. Most studies  
217 indicate that NCD clinics are not integrated, requiring PLWMM to make multiple trips for each disease.  
218 For patients with HIV comorbidity, most papers report that patients access ART care nearby and visit a  
219 hospital further away for the other disease like diabetes or hypertension. Although ART care is generally  
220 decentralized to primary health systems, this review highlights that lack of integrated and coordinated  
221 care at tertiary facilities compounds burden of treatment through increased time and financial demands  
222 for PLWMM (35, 37, 47).

223 *"I always get my ARVs from Ntabiseng clinic in Bara, and my diabetes pills from the diabetes*  
224 *clinic," female living with HIV and diabetes (23).*

225 *"Transportation is difficult because I am not working. I attend four clinics [. . .]. Today I am here,*  
226 *then next month I'll attend two other clinics." (Person living with multimorbidity) (23)*

227 While challenges persist, one study reported enhanced access to information, health education and  
228 medication availability improved diabetes self-management amongst patients in Malawi (37). This study  
229 aimed to explore self-management of diabetes at a facility implementing the World Health  
230 Organization's Package of Essential NCD Interventions for primary health care in low-resource settings  
231 (WHO PEN-Plus) (37).

232 We found that patients prioritize obtaining treatment despite financial concerns. Patients perceive the  
233 health outcomes of missing diabetes and hypertension treatment to outweigh the financial related costs  
234 due to transport, thus informing the decision making process (47, 50). Out-of-pocket expenditures thus

235 indicate a strong commitment to self-management among patients and their carers. Some patients  
236 modify treatment schedule and ration drugs titrated against symptoms of disease, a practice observed  
237 particularly among hypertensive patients (34, 38, 47), who may also purchase medications from  
238 informal sources like street vendors due to lower costs (47). Some patients, however, cannot afford  
239 medications representing a significant strain on financial well-being (36, 42). This leads to delayed or  
240 absent treatment, potentially leading to disease complications, while others may turn to alternative  
241 treatment pathways, such as traditional care (23, 40, 46, 47) or apply dietary management as an  
242 alternative, rather than complimentary treatment (46). Apart from limited access to biomedical  
243 treatment, the need to access care from multiple providers is also described by patients or carers who  
244 expressed dissatisfaction with biomedical treatment; perceived that treatment was too slow; or  
245 experienced side effects (23, 40, 45, 47). This requirement to access multiple providers may be  
246 associated with decreased use of biomedical care.

247 *“OK, we’ve tried the Western type of medicine for a long time ...but it’s not getting better as we*  
248 *would want it; we want see the other aspect the traditional and the religious one, see whether it*  
249 *will help him to be fine, even if he will be able to stand on the other foot.” (Guardian to a diabetic*  
250 *single amputee) (38). . . .”*

251 In some instances, patients may favor spiritual or traditional management over biomedical care but  
252 these indicate change in self-management after experiencing disease deterioration (23, 34, 39, 40, 46,  
253 47). In such cases, biomedical treatment is sometimes sought after experiencing an acute event (39, 40),  
254 some adopting exclusive medical treatment plans to minimize future disease complications (23, 39).

255 Multiple medical appointments lead to increased financial costs for patients (23, 29, 30), including  
256 failure to make medical appointments for fear of confrontation by health workers for seeking care  
257 outside the allocated day (23, 29, 30). Sometimes traditional vertical models of care delivery for  
258 PLWMM results in contradictory information regarding handling of conditions and decreased confidence  
259 in health care worker capacity to address complex cases (15, 23, 29).

260 *“The problem is that one doctor will tell you to do this and another asks you to do a different*  
261 *thing. I see different doctors for each disease. Last week, the Rheumatologist told me that my*  
262 *bones are getting closer to each other, they have inserted metals in my right foot. When I*  
263 *attended the diabetes clinic [earlier], the doctor asked me to exercise because I was adding more*  
264 *weight, but I can’t exercise because of the surgery they did on my leg. My ARVs have amplified*

265 *my appetite. I eat a lot and I am worried about my weight too. Last time I asked the*  
266 *endocrinologist what else I could do to deal with my appetite, my weight gain and inability to*  
267 *exercise, but he just looked at me without saying a word.” IDI, Female, 64, HIV, HTN, DM and*  
268 *arthritis (23).*

269

## 270 **Mistrust presents barriers to implementation of biomedical care**

271 Poor communication around the implementation of medical management for disease may create  
272 mistrust among patients and their carers. Misinformation or incomplete information can impact on  
273 medication adherence amongst patients or carers, presenting a significant barrier to biomedical care  
274 (31, 46). Treatment non-adherence emerges as partial, with deliberate on-and-off uptake, or complete  
275 non-uptake, with alternatives such as diet or spiritual management implemented as stand-alone forms  
276 of care (46).

277 *“Why do they give me free medicines for this diabetes? They know that it will never be cured. A*  
278 *real medicine is never free.” (31)*

279 *“I have purchased medicines that were fake . . . it is known that some make fake drugs so they*  
280 *can make lots of quick cash.” (Diabetic individual) (46).*

281 *“When they prescribe me pharmaceutical drugs, I refuse, because I have heard that once you are*  
282 *used to the medicine, you have to take them every day,” (Diabetic individual) (46).*

283 One study reports community delivery of diabetes drugs in South Africa improved access to drugs (29).

284 This adds on to evidence that availability of drugs closer to home improves treatment adherence (29,  
285 37).

286

## 287 **Stigma associated with chronic disease**

288 Patients with multimorbidity may experience stigma attached to individual chronic conditions such as  
289 HIV. In some cases, disclosure of conditions is secondary to maintaining social relationships especially  
290 among individuals living with HIV. Thus the value assigned to one’s social identity may negatively affect  
291 treatment adherence (15, 23, 45, 47) and potentially increase the risk of disease complications (29, 47).

292 *[. . .] they advised me that I should start taking medicine. They also advised me that I should be*  
293 *using condoms during sexual intercourse. So, there were many things that they advised me [. . .]*  
294 *They advised me this, but because I went there to attend antenatal clinic and I was also feeling*  
295 *well, I considered that as a useless thing [. . .] I just said aaah, with the behaviour of my husband*  
296 *how will I initiate this? I decided that I should first deliver my baby,” Female <50 HIV+HTN (47).*

297

## 298 **Dietary self-management practices**

299 Studies highlighted the importance of dietary management among PLWMM but that implementation is  
300 impacted by poverty and high cost of food (15, 31, 35, 37, 38, 41, 49); limited knowledge on portion size  
301 estimates (35, 46); and complexity of conditions and patients’ contrary cultural values (32, 35, 45, 46).  
302 Studies highlighted that preparation of separate meals for patients with chronic disease (32, 46, 47) was  
303 challenging, citing poverty and increased workload related to food preparation as the main reasons for  
304 not following dietary requirements (32, 35, 39, 44, 45, 47).

305 Patients and carers demonstrate of diet management are varied (41-43). Lay descriptions of  
306 recommended dietary practices include reducing the consumption of carbohydrates or sugar. However,  
307 these practices indicate faulty understanding of pertinent issues to mean only sweet foods contain sugar  
308 or starch is only present in flour. It also highlights limited comprehension of the need to balance  
309 amounts and time of consumption. Some patients and their carers suggest budgetary prioritization to  
310 optimize dietary management strategies (43).

311 *“Sometimes these days I do not eat breakfast because I think after dinner I’m satisfied until*  
312 *lunch.” (diabetic patient) (46) or not eating ‘starch’ but eating ‘rice’ (diabetic patient) (38).*

313 *“Oil that settles off when placed down can give you the illness [...],” (42-year-old diabetic*  
314 *patient) (39).*

315 *“If I want to eat the rice, my wife put the rice on a fire and put water on it, she will let the rice*  
316 *boil. Then she takes the starch and waste it. She put clean water on the rice again and wash it.*  
317 *Then she wastes it and then she let the rice steam. It shouldn’t be soft, it should be, you know,*  
318 *just normal rice. Then the rice does not contain no more starch,” man, diabetic, 62, retired*  
319 *college graduate (43).*

320 The inaccurate interpretations regarding what is starch or sugar, or the physical presentation of cooking  
321 oil stress that knowledge on what, how, when or how much negatively affects dietary implementation  
322 for disease. The challenge of comprehending dietary recommendations can create confusion when  
323 advice suggests moderating rather than completely eliminating certain foods (23, 34).

324 *“When I go to the private clinic the doctors advise me to stop taking meat, salt, sweet beverages,*  
325 *and not to use cooking fat/oil, but without telling me the reasons. When I come to the public*  
326 *hospital the nurse explains that I should take food in moderation, so I don’t know who to*  
327 *believe,” Female 58, overweight, diabetic.*

328 Diet management relates to social factors, kinship, cultural beliefs and systems indicating an intricate  
329 relationship between cultural beliefs and what people eat (32, 35, 42, 43, 45, 46). We note that cultural  
330 identity, family influence, or community norms may significantly impact dietary practices, sometimes  
331 leading to a preference for traditional foods that do not align with medical dietary recommendations.  
332 Two studies indicate patient’ implementation of contrary practices indicative of the value placed in  
333 cultural identity (31, 45).

334 *“Being African, I eat rice for lunch because it is part of my culture and Senegalese men like to eat*  
335 *fatty and oily “thiebou dien” every day (Diabetic patient) (45).*

336 Desperation or defeatist attitude emerge among diabetic patients who feel hopeless (31, 45, 46) citing  
337 diabetes: *“diabetes is a slow poison”* (35, 46). Such an attitude may normalize certain behaviors contrary  
338 to recommended practices for PLWMM. Alternatively, it may indicate a lack of assertiveness or  
339 demotivation among patients, who may feel overwhelmed. This perspective can also weaken patients’  
340 resolve to adhere to their treatment plans if they perceive their efforts as futile against the challenges  
341 posed by their condition.

342 *“There are several people that I have met who do not care [about diabetes]. During social events*  
343 *such as wedding, prayers, or funeral, you will see them overeat . . . they tell me . . . you only die*  
344 *once.” (Man, diabetic) (46).*

345 *“ You cannot tell your wife that these days do not prepare this. Because you are the only one*  
346 *with diabetes. . . You must be flexible . . . the issue of dietary restrictions is problematic.”*  
347 *(Diabetic man) (46).*

348

### 349 **Psychological stress among PLWMM**

350 Patients and carers within the included studies reported that anxiety and depression are more  
351 pronounced among PLWMM than with single chronic disease (15, 23, 29, 31, 33, 34, 47). Patients with  
352 both diabetes and chronic kidney disease had particularly high levels of stress (15, 23). Studies reported  
353 that a single diagnosis of hypertension or HIV were associated with lower stress levels (47). Reported  
354 stressors included pain; deterioration of disease; onset of new illness and symptoms. These were  
355 exacerbated by poverty and limited access to biomedical treatment. For effective emotional  
356 management of chronic disease, patients must be able to risk assess; manage time; communicate; and  
357 think analytically. These processes facilitate problem solving; allocation of scarce resources;  
358 prioritization of conditions; and coordination of self-care (33-35, 47). In most cases, the dominant  
359 sources of information include family members (including those who live or had provided care to family  
360 member with a similar disease), other patients and health workers (15, 23, 39, 51). The studies  
361 demonstrate that PLWMM avoid stressors that may complicate their conditions (15, 29, 34, 35, 39).

362 *“I must also keep my temper in check as I can’t afford to lose it otherwise, I risk escalating my*  
363 *blood sugar level and blood pressure”.* (Woman with hypertension and diabetes) (29).

364 Depression is cited by PLWMM as they negotiate the burden of conditions (23) or disrupted social  
365 relationships (15, 32, 47).

366

### 367 **Lay understanding and implementation of physical activity**

368 PLWMM and their carers recognise the benefit of regular physical activity towards functional  
369 performance (15, 30). Some studies highlight the link between physical management and wellbeing (15,  
370 32).

371 *“I bought a testing device which I use to check myself every day. When I was employed, it was*  
372 *helping me because I was walking a long distance to minibus depot which was part of exercise*  
373 *and with the nature of my work, I was working under the sun and I was sweating, so it was also*  
374 *part of my physical exercise and when I test my sugar the following morning it was at a good*  
375 *level such as 90,”* Male <50 hypertension and diabetic (15).

376 For women living with multimorbidity, physical exercise was embedded within daily living activities such  
377 as domestic chores like cleaning, washing and walking to work (35, 40, 44) rather than public exercise  
378 (23, 40, 46). This integration of physical exercise into daily living activities offers a practical, accessible,  
379 and sustainable approach to improving health outcomes for PLWMM (35, 47).

380 Barriers to physical management for PLWMM were pain, age, lack of clarity on nature of exercise and  
381 competing priorities (15, 29, 31, 32, 39-41, 47). Anxiety, fear of exertion and motivation affect  
382 implementation of physical exercise (23, 44). Fear stems from concerns about worsening their condition,  
383 experiencing pain, or facing physical limitations, thereby creating a cycle of avoidance and inactivity that  
384 perpetuates disease complications (32).

385 *“... with me I don’t walk long distances at all because of my chest, I get a tight chest when I walk*  
386 *a distance and I start coughing,”* Patient with hypertension (30).

387 *‘I do try to exercise sometimes, but you know I get tired ... and I will do it for a month only, then I*  
388 *just get tired. I am not lazy, but ....’* Female, hypertension (30).

389 In one study, physical management is applied as an alternative in the absence of diet management.

390 *‘To deal with these challenges, Participant Y has opted to pay for a gym, which he finds to be*  
391 *affordable at R340 (US\$22) a month, compared with buying healthy foods which he says “are*  
392 *expensive.”* Man, 67, HTN and DM (23).

393

#### 394 **Social capital for managing multimorbidity**

395 Social support was found to facilitate self-management in all included studies (23, 31, 32, 39, 40, 46, 47,  
396 50). Where disclosure of condition(s) is accepted, the patient or carer leverages on social capital and  
397 gets support for financial, physical or emotional management (15, 33-35, 39). Conversely, lack of social  
398 support means patients learn to manage other people’s expectations (33, 45, 49), and sometimes, self-  
399 isolate where community expectations contradict recommended medical care (15, 44). Failure to  
400 manage external expectations sometimes leads to feelings of worthlessness among patients (15, 31).  
401 Challenges to emotional support include competing priorities among individuals who can provide  
402 support, family and social commitments and PLWMM themselves being carers to others living with  
403 chronic conditions [19, 28, 30]. The absence of emotional support negatively affects relationships (15,



404 29, 47). Peer support is common among patients with HIV, whether as singular or comorbid conditions

405 (23, 29, 32, 34, 35, 39, 44, 47).

406

407

## 408 Discussion

409 These results offer a comprehensive understanding of the experiences and coping strategies related to  
410 self-managing multimorbidity among patients and their carers in sub-Saharan Africa. This is important  
411 because effective self-management strategies are key to controlling chronic conditions, preventing  
412 complications, and improving quality and longevity of life. Further work is required to explore how  
413 patients and carers can be empowered to manage multimorbidity. We recommend that health literacy  
414 programmes are tailored to context to ensure that recommendations are sustainable and deliverable  
415 within the healthcare system and that advice is tailored toward social and cultural norms and practical  
416 realities.

417

418 We found high intention to use biomedical treatment among patients with multimorbidity or individual  
419 chronic diseases in SSA (15, 23, 29-32, 34, 35, 38-40, 44-47). However, multiple factors limit  
420 implementation of effective self-management strategies. In SSA, patients frequently must access  
421 multiple providers and incur out-of-pocket expenses to obtain medications, increasing treatment  
422 burden and financial strain (16, 52, 53). Financial constraints require that PLWMM often need to ration  
423 drugs or compromise dietary choices. Clearly, working toward universal healthcare coverage (UHC)  
424 would help to address some of these issues. Whilst health ministries develop and implement UHC,  
425 however, pragmatic sustainable guidance should be developed for patients to help them make optimal  
426 prioritisation decisions based on their individual circumstances. Work to improve health literacy and  
427 advocacy in patients and their carers is important to drive self-efficacy and self-management of  
428 multimorbid disease with examples in Malawi (54), Ethiopia (55), Uganda (56) and South Africa (16, 20).  
429 Building social support facilities may also help PLWMM and their carers navigate perceived barriers to  
430 self-management (57). In Kenya, for example, PLWMM who attended support groups demonstrated  
431 improved decision making and treatment compliance (58).

432

433 Our meta-synthesis shows that PLWMM and their carers apply a biosocial lens to self-management and  
434 implement strategies between conditions according to their perceived understanding of disease etiology  
435 and severity. A systematic review on determinants of HIV treatment adherence in SSA reports that  
436 adherence is linked to patient perceptions towards improved health outcomes (59). A key priority,  
437 therefore, for PLWMM in SSA would be to link management strategies with measures of disease control.

438 Creating these feedback loops would help to reinforce self-management decisions and priority setting  
439 for both patients and their carers. For example, temporary drug withdrawal was commonly reported  
440 among patients with hypertension. This may reflect fear of long-term treatment (58, 60) and/or  
441 communication challenges between healthcare workers and patients (60). Measures to increase patient  
442 autonomy and ownership of their hypertension together with a disease control feedback loop (e.g.  
443 blood pressure control measurements) could promote improved self-management decisions. Strategies  
444 to improve physical activity in PLWMM need to be tailored toward individuals so that they are  
445 meaningful but also relevant and sustainable. Limited knowledge and low self-efficacy are currently  
446 reported as barriers to physical exercise for PLWMM within the current literature (30, 52, 61, 62).

#### 447 **Strength and limitations**

448 To our knowledge, this study is the first qualitative meta-synthesis review to synthesize lived  
449 experiences regarding self-management of multimorbidity among patients living with a combination of  
450 diabetes, hypertension, chronic kidney disease or HIV. Our authorship group represents a  
451 multidisciplinary team including both clinical and qualitative expertise to facilitate rigorous meta-  
452 synthesis approaches and clinical relevance. The strength of our findings are limited by the relative  
453 paucity of relevant literature in this area. Exclusion of studies not published in English is a limitation and  
454 may reduce the generalisability of our findings across different linguistic and cultural contexts. We did  
455 not include quantitative data from included papers that utilised mixed methods within our qualitative  
456 synthesis. The review may therefore overlook important numerical insights that could contribute to a  
457 more comprehensive understanding of the topic.

#### 458 **Conclusion**

459 We found that PLWMM and their carers were motivated to self-manage their conditions but face  
460 multiple barriers including both financial and health systems constraints. Health systems strengthening  
461 is essential to develop more horizontal and holistic models of care delivery to reduce the need for  
462 multiple healthcare interactions and promote joined up care. Contextually sensitive measures to  
463 improve health literacy and autonomy should be prioritised as a component of this strengthening to  
464 help patients and their carers develop the tools required to manage their long-term health conditions.  
465 The development and support of community groups may bolster this process where members can  
466 support delivery of appropriate lay information and provide support to patients, reducing pressure on  
467 health systems.

468 **Funding**

469 This research was funded by the NIHR (NIHR201708) using UK international development funding from  
470 the UK Government to support global health research. The views expressed in this publication are those  
471 of the author(s) and not necessarily those of the NIHR or the UK government.

472

473 **Competing interests:** None declared

474

475 **Acknowledgements**

476 We would like to acknowledge Ms. Alison Derbyshire, the Academic Liaison & Training Specialist,  
477 Liverpool School of Tropical Medicine (LSTM) for her assistance in the search strategy. We would also  
478 like to acknowledge the authors of the original manuscripts for their dedication to this topic and for  
479 elevating the voices of marginalized people in sub-Saharan Africa.

## 480 **References**

- 481 1. Price AJ, Jobe M, Sekitoleko I, Crampin AC, Prentice AM, Seeley J, et al. Epidemiology of  
482 multimorbidity in low-income countries of sub-Saharan Africa: Findings from four population cohorts.  
483 PLOS Glob Public Health. 2023;3(12):e0002677.
- 484 2. Academy of Medical Sciences. Improving the prevention and management of multimorbidity in  
485 sub-Saharan Africa. London; 2019.
- 486 3. Gouda HN, Charlson F, Sorsdahl K, Ahmadzada S, Ferrari AJ, Erskine H, et al. Burden of non-  
487 communicable diseases in sub-Saharan Africa, 1990–2017: results from the Global Burden of Disease  
488 Study 2017. The Lancet Global Health. 2019;7(10):e1375-e87.
- 489 4. Dixon J, Morton B, Nkhata MJ, Silman A, Simiyu IG, Spencer SA, et al. Interdisciplinary  
490 perspectives on multimorbidity in Africa: developing an expanded conceptual model. medRxiv.  
491 2023:2023.09.19.23295816.
- 492 5. Banda G, Bosire E, Bunn C, Chandler C, Chikumbu E, Chiwanda J, et al. Multimorbidity research  
493 in Sub-Saharan Africa: Proceedings of an interdisciplinary workshop [version 1; peer review: 1 approved  
494 with reservations]. Wellcome Open Research. 2023;8(110).
- 495 6. Spencer SA, Rylance J, Quint JK, Gordon SB, Dark P, Morton B. Use of hospital services by  
496 patients with chronic conditions in sub-Saharan Africa: a systematic review and meta-analysis. Bull  
497 World Health Organ. 2023;101(9):558-70g.
- 498 7. Lorig K. Self-Management of Chronic Illness: A Model for the Future. Generations: Journal of the  
499 American Society on Aging. 1993;17(3):11-4.
- 500 8. Schulman-Green D, Jaser S, Martin F, Alonzo A, Grey M, McCorkle R, et al. Processes of self-  
501 management in chronic illness. J Nurs Scholarsh. 2012;44(2):136-44.
- 502 9. Aantjes CJ, Ramerman L, Bunders JFG. A systematic review of the literature on self-management  
503 interventions and discussion of their potential relevance for people living with HIV in sub-Saharan Africa.  
504 Patient Education & Counseling. 2014;95(2):185-200.
- 505 10. World Health Organization. Multimorbidity: Technical Series on Safer Primary Care. Geneva:  
506 World Health Organization; 2016. Report No.: Licence: CC BY-NC-SA 3.0 IGO.
- 507 11. Grady PA, Gough LL. Self-management: a comprehensive approach to management of chronic  
508 conditions. Am J Public Health. 2014;104(8):e25-31.
- 509 12. Asogwa OA, Boateng D, Marzà-Florensa A, Peters S, Levitt N, van Olmen J, et al. Multimorbidity  
510 of non-communicable diseases in low-income and middle-income countries: a systematic review and  
511 meta-analysis. BMJ Open. 2022;12(1):e049133.

- 512 13. Academy of Medical Sciences. Multimorbidity: a priority for global health research. Google  
513 scholar. 2019.
- 514 14. Yadav UN, Lloyd J, Hosseinzadeh H, Baral KP, Bhatta N, Harris MF. Self-management practice,  
515 associated factors and its relationship with health literacy and patient activation among multi-morbid  
516 COPD patients from rural Nepal. *BMC Public Health*. 2020;20(1):300.
- 517 15. Chikumbu EF, Bunn C, Kasenda S, Dube A, Phiri-Makwakwa E, Jani BD, et al. Experiences of  
518 multimorbidity in urban and rural Malawi: an interview study of burdens of treatment and lack of  
519 treatment. *PLoS Global Public Health*. 2022;2(3).
- 520 16. van Pinxteren M, Mbokazi N, Murphy K, Mair FS, May C, Levitt N. The impact of persistent  
521 precarity on patients' capacity to manage their treatment burden: A comparative qualitative study  
522 between urban and rural patients with multimorbidity in South Africa. *Frontiers in Medicine*. 2023;10.
- 523 17. Tran PB, Ali A, Ayesha R, Boehnke JR, Ddungu C, Lall D, et al. An interpretative  
524 phenomenological analysis of the lived experience of people with multimorbidity in low- and middle-  
525 income countries. *BMJ Global Health*. 2024;9(1):e013606.
- 526 18. Shippee ND, Shah ND, May CR, Mair FS, Montori VM. Cumulative complexity: a functional,  
527 patient-centered model of patient complexity can improve research and practice. *J Clin Epidemiol*.  
528 2012;65(10):1041-51.
- 529 19. Ridgeway JL, Egginton JS, Tiedje K, Linzer M, Boehm D, Poplau S, et al. Factors that lessen the  
530 burden of treatment in complex patients with chronic conditions: a qualitative study. *Patient Prefer*  
531 *Adherence*. 2014;8:339-51.
- 532 20. Roomaney RA, van Wyk B, Pillay-van Wyk V. Multimorbidity in South Africa: Is the health system  
533 ready? *J Multimorb Comorb*. 2023;13:26335565231182483.
- 534 21. Coventry PA, Small N, Panagioti M, Adeyemi I, Bee P. Living with complexity; marshalling  
535 resources: a systematic review and qualitative meta-synthesis of lived experience of mental and physical  
536 multimorbidity. *BMC Family Practice*. 2015;16(1):171.
- 537 22. Younas A, Inayat S. Alleviating suffering of individuals with multimorbidity and complex needs: A  
538 descriptive qualitative study. *Nursing Ethics*.0(0):09697330231191280.
- 539 23. Bosire EN. Patients' Experiences of Comorbid HIV/AIDS and Diabetes Care and Management in  
540 Soweto, South Africa. *Qualitative health research*. 2021;31(2):373-84.
- 541 24. Gouda HN, Charlson F, Sorsdahl K, Ahmadzada S, Ferrari AJ, Erskine H, et al. Burden of non-  
542 communicable diseases in sub-Saharan Africa, 1990&#x2013;2017: results from the Global Burden of  
543 Disease Study 2017. *The Lancet Global Health*. 2019;7(10):e1375-e87.

- 544 25. Sandelowski M, Barroso J, Voils CI. Using qualitative metasummary to synthesize qualitative and  
545 quantitative descriptive findings. *Res Nurs Health*. 2007;30(1):99-111.
- 546 26. Critical Appraisal Skills Programme (CASP). *Critical Appraisal Skills Programme (CASP)*. 2013.  
547 Qualitative research checklist URL: <http://media.wix.com/ugd/>. 2013.
- 548 27. Braun V, Clarke V. Using thematic analysis in psychology. *Qualitative Research in Psychology*.  
549 2006;3(2):77-101.
- 550 28. Ludvigsen M, Hall E, Meyer G, Fegran L, Aagaard H, Uhrenfeldt L. Using Sandelowski and  
551 Barroso's Meta-Synthesis Method in Advancing Qualitative Evidence 2016.
- 552 29. Mendenhall E, Norris SA. Diabetes care among urban women in Soweto, South Africa: a  
553 qualitative study. *BMC public health*. 2015;15:1300.
- 554 30. Magobe NBD, Poggenpoel M, Myburgh C. Experiences of patients with hypertension at primary  
555 health care in facilitating own lifestyle change of regular physical exercise. *Curationis*. 2017;40(1):e1-e8.
- 556 31. Matwa P, Chabeli MM, Muller M, Levitt NS. Experiences and guidelines for footcare practices of  
557 patients with diabetes mellitus. *Curationis*. 2003;26(1):11-21.
- 558 32. Steyl T, Phillips J. Management of type 2 diabetes mellitus: adherence challenges in  
559 environments of low socio-economic status. *African journal of primary health care & family medicine*.  
560 2014;6(1):E1-E7.
- 561 33. Tyabazeka S, Phiri W, Marie Modeste RR. HIV self-management perceptions and experiences of  
562 students at one university in South Africa. *Curationis*. 2024;47(1):e1-e10.
- 563 34. Moucheraud C, Phiri K, Hoffman RM. Health behaviours and beliefs among Malawian adults  
564 taking antihypertensive medication and antiretroviral therapy: A qualitative study. *Global public health*.  
565 2022;17(5):688-99.
- 566 35. Mphwanthe G, Carolan M, Earnesty D, Weatherspoon L. Perceived barriers and facilitators to  
567 diet and physical activity among adults diagnosed with type 2 diabetes in Malawi. *Global public health*.  
568 2021;16(3):469-84.
- 569 36. Angwenyi V, Aantjes C, Bunders-Aelen J, Lazarus JV, Criel B. Patient-provider perspectives on  
570 self-management support and patient empowerment in chronic care: A mixed-methods study in a rural  
571 sub-Saharan setting. *Journal of Advanced Nursing (John Wiley & Sons, Inc)*. 2019;75(11):2980-94.
- 572 37. Drown L, Adler AJ, Schwartz LN, Sichali J, Valeta F, Boudreaux C, et al. Living with type 1 diabetes  
573 in Neno, Malawi: a qualitative study of self-management and experiences in care. *BMC health services  
574 research*. 2023;23(1):595.

- 575 38. Aikins AdG, Awuah RB, Pera TA, Mendez M, Ogedegbe G. Explanatory models of diabetes in  
576 urban poor communities in Accra, Ghana. *Ethnicity & Health*. 2015;20(4):391-408.
- 577 39. de-Graft Aikins A. Healer shopping in Africa: new evidence from rural-urban qualitative study of  
578 Ghanaian diabetes experiences. *BMJ (Clinical research ed)*. 2005;331(7519):737.
- 579 40. Amu H, Darteh EKM, Tarkang EE, Kumi-Kyereme A. Management of chronic non-communicable  
580 diseases in Ghana: a qualitative study using the chronic care model. *BMC public health*. 2021;21(1):1120.
- 581 41. Ukoha-Kalu BO, Adibe MO, Ukwe CV. A qualitative study of patients' and carers' perspectives on  
582 factors influencing access to hypertension care and compliance with treatment in Nigeria. *Journal of*  
583 *hypertension*. 2023;41(5):845-51.
- 584 42. Bleah P, Wilson R, Macdonald D, Camargo-Plazas P. 'The solution is we need to have a centre': a  
585 study on diabetes in Liberia. *Health promotion international*. 2023;38(5).
- 586 43. Bleah P, Wilson R, Macdonald D, Camargo Plazas P. "When I Don't Have Money, I Don't Eat": A  
587 Critical Hermeneutic Study of Diabetes in Liberia2023.
- 588 44. Okurumeh AI, Akpor OA, Okeya OE, Akpor OB. Type 2 diabetes mellitus patients' lived  
589 experience at a tertiary hospital in Ekiti State, Nigeria. *Scientific reports*. 2022;12(1):8481.
- 590 45. BeLue R, Diaw M, Ndao F, Okoror T, Degboe A, Abiero B. A cultural lens to understanding daily  
591 experiences with type 2 diabetes self-management among clinic patients in M'bour, Senegal.  
592 *International quarterly of community health education*. 2012;33(4):329-47.
- 593 46. Abdulrehman MS, Woith W, Jenkins S, Kossman S, Hunter GL. Exploring Cultural Influences of  
594 Self-Management of Diabetes in Coastal Kenya: An Ethnography. *Global qualitative nursing research*.  
595 2016;3:2333393616641825.
- 596 47. Angwenyi V, Aantjes C, Kajumi M, De Man J, Criel B, Bunders-Aelen J. Patients experiences of  
597 self-management and strategies for dealing with chronic conditions in rural Malawi. *PLoS ONE*.  
598 2018;13(7):1-17.
- 599 48. Mphwanthe G, Carolan MT, Earnesty D, Weatherspoon LJ. Perceived barriers and facilitators to  
600 diet and physical activity among adults diagnosed with type 2 diabetes in Malawi. *Global Public Health*.  
601 2020;16:469 - 84.
- 602 49. Angwenyi V, Bunders-Aelen J, Criel B, Lazarus JV, Aantjes C. An evaluation of self-management  
603 outcomes among chronic care patients in community home-based care programmes in rural Malawi: A  
604 12-month follow-up study. *Health & Social Care in the Community*. 2021;29(2):353-68.



- 605 50. Mphande M, Campbell P, Hoffman RM, Phiri K, Nyirenda M, Gupta SK, et al. Barriers and  
606 facilitators to facility HIV self-testing in outpatient settings in Malawi: a qualitative study. *BMC Public*  
607 *Health*. 2021;21(2200).
- 608 51. Amu H, Brinsley TY, Kwafo FO, Amu S, Bain LE. Improving investment in chronic disease care in  
609 Sub-Saharan Africa is crucial for the achievement of SDG 3.4: application of the chronic care model.  
610 *Archives of Public Health*. 2023;81(1):169.
- 611 52. Murphy K, Chuma T, Mathews C, Steyn K, Levitt N. A qualitative study of the experiences of care  
612 and motivation for effective self-management among diabetic and hypertensive patients attending  
613 public sector primary health care services in South Africa. *BMC health services research*. 2015;15:303.
- 614 53. Areri HA, Marshall A, Harvey G. Interventions to improve self-management of adults living with  
615 HIV on Antiretroviral Therapy: A systematic review. *PloS one*. 2020;15(5):e0232709.
- 616 54. Kwanjo Banda C, Gombachika B, Nyirenda M, Muula A. Self-management and its associated  
617 factors among people living with diabetes in Blantyre, Malawi: a cross-sectional study [version 2; peer  
618 review: 2 approved with reservations]. *Open Research Africa*. 2021;2(161).
- 619 55. Ferrari G, Ngoga G, Manzi A, Gomber A. Peer Support in the Management of Diabetes to  
620 Improve Cardiovascular Disease Outcomes in Low- and Middle-Income Countries (LMICs). *Global Heart*.  
621 2023.
- 622 56. Tusubira AK, Nalwadda CK, Akiteng AR, Hsieh E, Ngaruiya C, Rabin TL, et al. Social Support for  
623 Self-Care: Patient Strategies for Managing Diabetes and Hypertension in Rural Uganda. *Annals of Global*  
624 *Health*. 2021.
- 625 57. Adeniyi A, Idowu O, Ogwumike O, Adeniyi C. Comparative influence of self-efficacy, social  
626 support and perceived barriers on low physical activity development in patients with type 2 diabetes,  
627 hypertension or stroke. *Ethiop J Health Sci*. 2012;22(2):113-9.
- 628 58. Otieno P, Agyemang C, Wilunda C, Sanya RE, Iddi S, Wami W, et al. Effect of Patient Support  
629 Groups for Hypertension on Blood Pressure among Patients with and Without Multimorbidity: Findings  
630 from a Cohort Study of Patients on a Home-Based Self-Management Program in Kenya. *Global Heart*.  
631 2023.
- 632 59. Heestermans T, Browne JL, Aitken SC, Vervoort SC, Klipstein-Grobusch K. Determinants of  
633 adherence to antiretroviral therapy among HIV-positive adults in sub-Saharan Africa: a systematic  
634 review. *BMJ Global Health*. 2016;1(4):e000125.

635 60. Macquart de Terline D, Kane A, Kramoh KE, Ali Toure I, Mipinda JB, Diop IB, et al. Factors  
636 associated with poor adherence to medication among hypertensive patients in twelve low and middle  
637 income Sub-Saharan countries. PLOS ONE. 2019;14(7):e0219266.

638 61. Modeste RRM, Majeke SJ. Self-care symptom-management strategies amongst women living  
639 with HIV/AIDS in an urban area in KwaZulu-Natal. Health SA Gesondheid (Online). 2010;15:1-8.

640 62. Schulman-Green D, Jaser SS, Park C, Whittmore R. A metasynthesis of factors affecting self-  
641 management of chronic illness. J Adv Nurs. 2016;72(7):1469-89.

642

643

644

645

**Fig 1:**

**PRISMA flow chart**

medRxiv preprint doi: <https://doi.org/10.1101/2024.09.27.24314469>; this version posted September 30, 2024. The copyright holder for this preprint (which was not certified by peer review) is the author/funder, who has granted medRxiv a license to display the preprint in perpetuity. It is made available under a [CC-BY 4.0 International license](#).

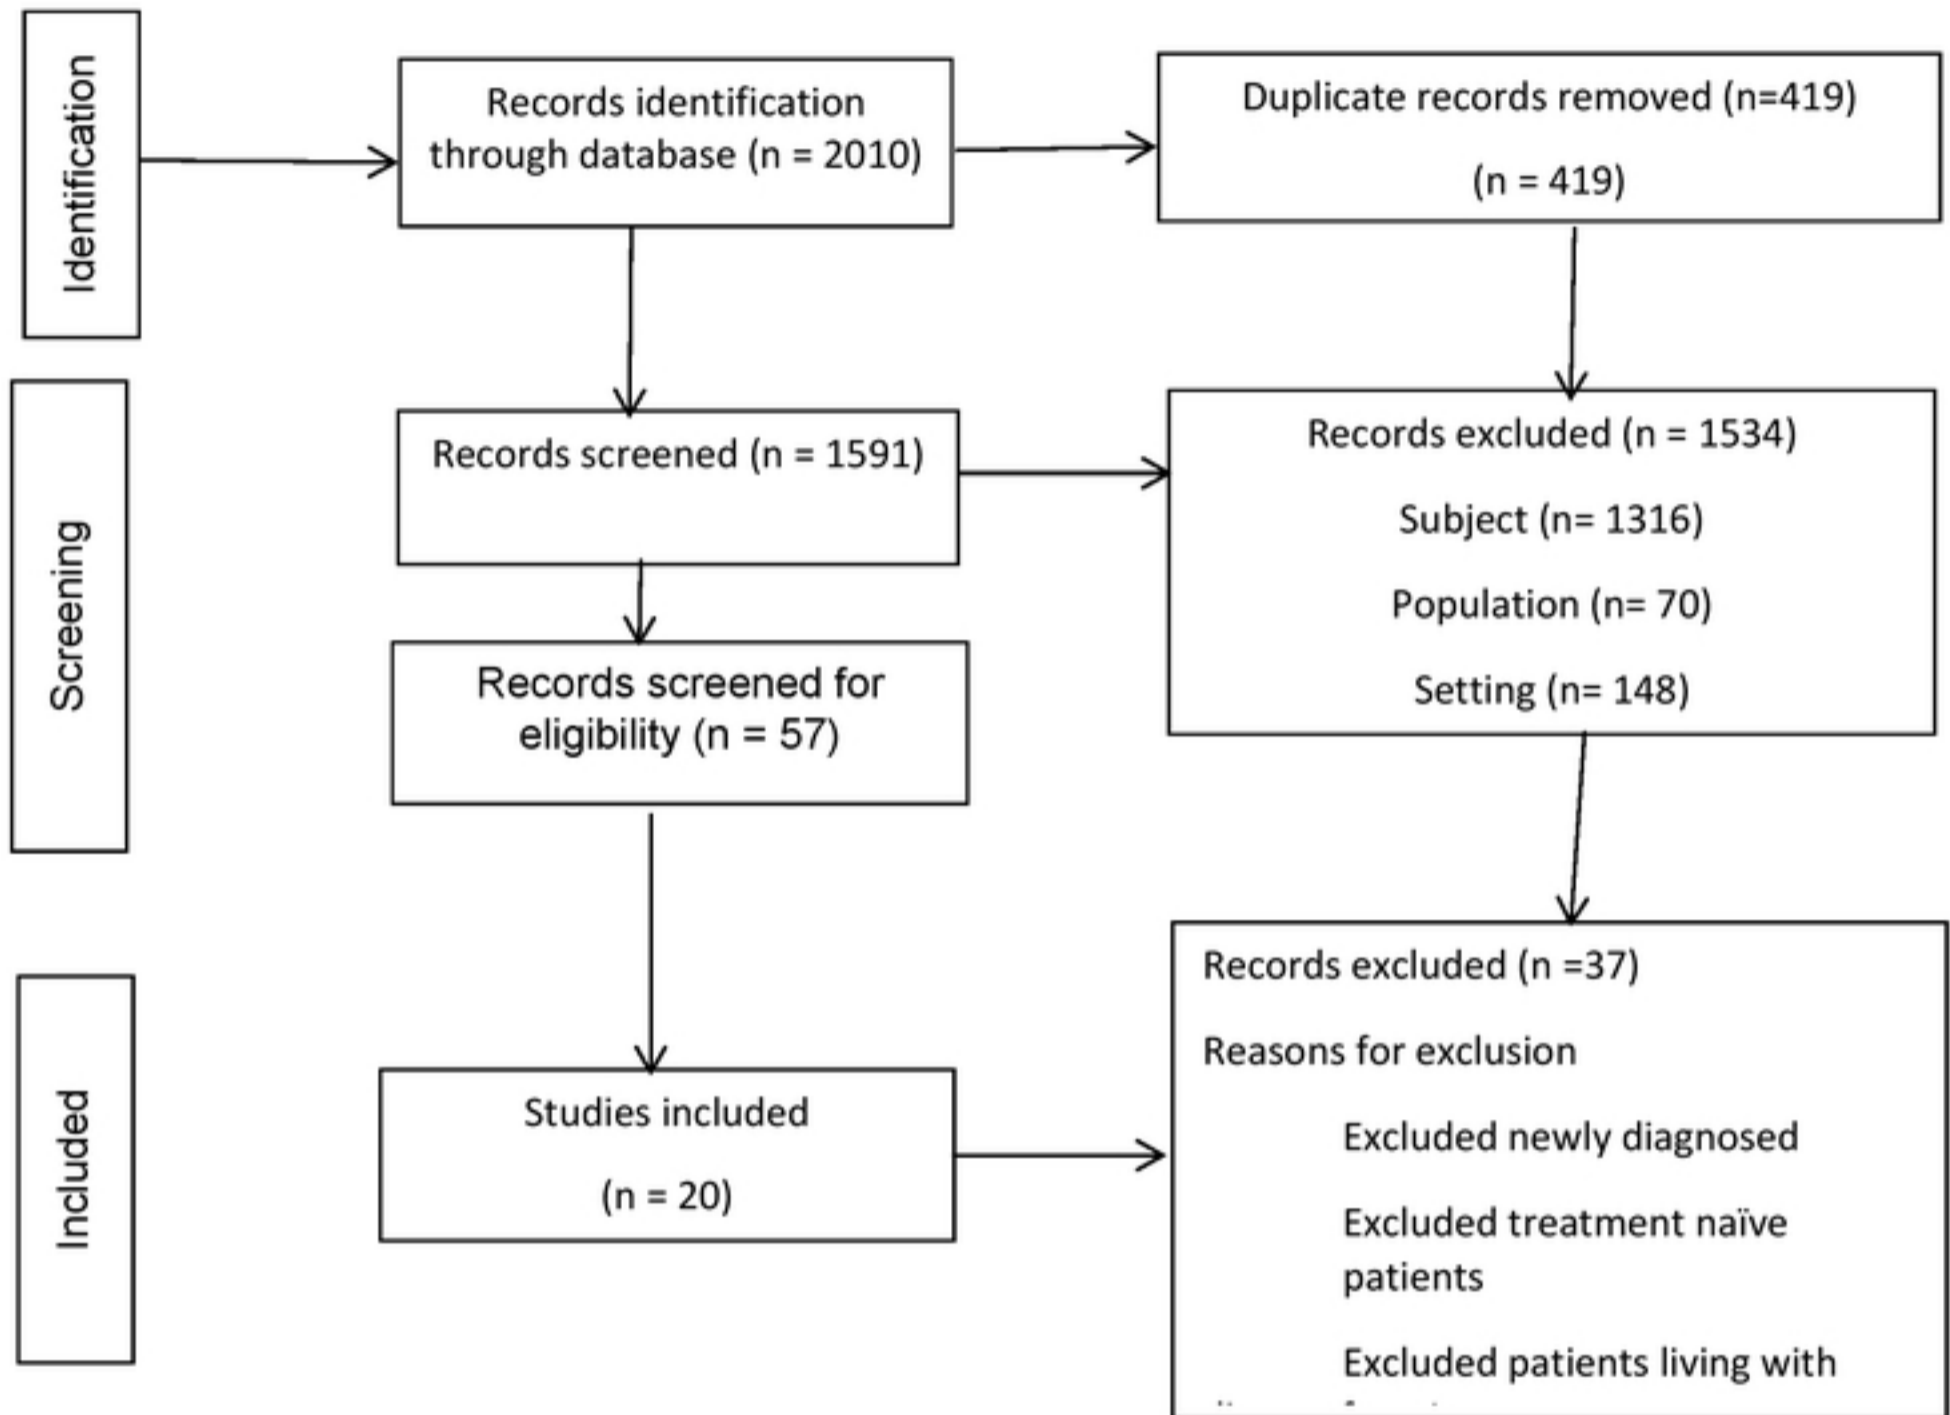

## CASP Checklist: 10 questions to help you make sense of a **Qualitative** research

**How to use this appraisal tool:** Three broad issues need to be considered when appraising a qualitative study:

-  Are the results of the study valid? (Section A)
-  What are the results? (Section B)
-  Will the results help locally? (Section C)

The 10 questions on the following pages are designed to help you think about these issues systematically. The first two questions are screening questions and can be answered quickly. If the answer to both is “yes”, it is worth proceeding with the remaining questions. There is some degree of overlap between the questions, you are asked to record a “yes”, “no” or “can’t tell” to most of the questions. A number of italicised prompts are given after each question. These are designed to remind you why the question is important. Record your reasons for your answers in the spaces provided.

**About:** These checklists were designed to be used as educational pedagogic tools, as part of a workshop setting, therefore we do not suggest a scoring system. The core CASP checklists (randomised controlled trial & systematic review) were based on JAMA ‘Users’ guides to the medical literature 1994 (adapted from Guyatt GH, Sackett DL, and Cook DJ), and piloted with health care practitioners.

For each new checklist, a group of experts were assembled to develop and pilot the checklist and the workshop format with which it would be used. Over the years overall adjustments have been made to the format, but a recent survey of checklist users reiterated that the basic format continues to be useful and appropriate.

**Referencing:** we recommend using the Harvard style citation, i.e.: *Critical Appraisal Skills Programme (2018). CASP (insert name of checklist i.e. Qualitative) Checklist. [online] Available at: URL. Accessed: Date Accessed.*

©CASP this work is licensed under the Creative Commons Attribution – Non-Commercial-Share A like. To view a copy of this license, visit <http://creativecommons.org/licenses/by-nc-sa/3.0/> [www.casp-uk.net](http://www.casp-uk.net)

Paper for appraisal and reference:

medRxiv preprint doi: <https://doi.org/10.1101/2024.09.27.24314469>; this version posted September 30, 2024. The copyright holder for this preprint (which was not certified by peer review) is the author/funder, who has granted medRxiv a license to display the preprint in perpetuity. It is made available under a [CC-BY 4.0 International license](https://creativecommons.org/licenses/by/4.0/).

1. Was there a clear statement of the aims of the research?

|            |                          |
|------------|--------------------------|
| Yes        | <input type="checkbox"/> |
| Can't Tell | <input type="checkbox"/> |
| No         | <input type="checkbox"/> |

- HINT: Consider**
- what was the goal of the research
  - why it was thought important
  - its relevance

Comments:

2. Is a qualitative methodology appropriate?

|            |                          |
|------------|--------------------------|
| Yes        | <input type="checkbox"/> |
| Can't Tell | <input type="checkbox"/> |
| No         | <input type="checkbox"/> |

- HINT: Consider**
- If the research seeks to interpret or illuminate the actions and/or subjective experiences of research participants
  - Is qualitative research the right methodology for addressing the research goal

Comments:

Is it worth continuing?

3. Was the research design appropriate to address the aims of the research?

|            |                          |
|------------|--------------------------|
| Yes        | <input type="checkbox"/> |
| Can't Tell | <input type="checkbox"/> |
| No         | <input type="checkbox"/> |

- HINT: Consider**
- if the researcher has justified the research design (e.g. have they discussed how they decided which method to use)

Comments:

medRxiv preprint doi: <https://doi.org/10.1101/2024.09.27.24314469>; this version posted September 30, 2024. The copyright holder for this preprint (which was not certified by peer review) is the author/funder, who has granted medRxiv a license to display the preprint in perpetuity. It is made available under a [CC-BY 4.0 International license](https://creativecommons.org/licenses/by/4.0/).

4. Was the recruitment

the aims of the research?

|            |                          |
|------------|--------------------------|
| Yes        | <input type="checkbox"/> |
| Can't Tell | <input type="checkbox"/> |
| No         | <input type="checkbox"/> |

HINT: Consider

- If the researcher has explained how the participants were selected
- If they explained why the participants they selected were the most appropriate to provide access to the type of knowledge sought by the study
- If there are any discussions around recruitment (e.g. why some people chose not to take part)

Comments:

5. Was the data collected in a way that addressed the research issue?

|            |                          |
|------------|--------------------------|
| Yes        | <input type="checkbox"/> |
| Can't Tell | <input type="checkbox"/> |
| No         | <input type="checkbox"/> |

HINT: Consider

- If the setting for the data collection was justified
- If it is clear how data were collected (e.g. focus group, semi-structured interview etc.)
- If the researcher has justified the methods chosen
- If the researcher has made the methods explicit (e.g. for interview method, is there an indication of how interviews are conducted, or did they use a topic guide)
- If methods were modified during the study. If so, has the researcher explained how and why
- If the form of data is clear (e.g. tape recordings, video material, notes etc.)
  - If the researcher has discussed saturation of data

Comments:

It is made available under a [CC-BY 4.0 International license](https://creativecommons.org/licenses/by/4.0/).

6. Has the relationship between researcher and participants been adequately considered?

|            |                          |
|------------|--------------------------|
| Yes        | <input type="checkbox"/> |
| Can't Tell | <input type="checkbox"/> |
| No         | <input type="checkbox"/> |

HINT: Consider

- If the researcher critically examined their own role, potential bias and influence during (a) formulation of the research questions (b) data collection, including sample recruitment and choice of location
- How the researcher responded to events during the study and whether they considered the implications of any changes in the research design

Comments:

Section B: What are the results?

7. Have ethical issues been taken into consideration?

|            |                          |
|------------|--------------------------|
| Yes        | <input type="checkbox"/> |
| Can't Tell | <input type="checkbox"/> |
| No         | <input type="checkbox"/> |

HINT: Consider

- If there are sufficient details of how the research was explained to participants for the reader to assess whether ethical standards were maintained
- If the researcher has discussed issues raised by the study (e.g. issues around informed consent or confidentiality or how they have handled the effects of the study on the participants during and after the study)
- If approval has been sought from the ethics committee

Comments:

8. Was the data analysis

medRxiv preprint doi: <https://doi.org/10.1101/2024.09.27.24314469>; this version posted September 30, 2024. The copyright holder for this preprint (which was not certified by peer review) is the author/funder, who has granted medRxiv a license to display the preprint in perpetuity. It is made available under a [CC-BY 4.0 International license](https://creativecommons.org/licenses/by/4.0/).

|            |                          |
|------------|--------------------------|
| Yes        | <input type="checkbox"/> |
| Can't Tell | <input type="checkbox"/> |
| No         | <input type="checkbox"/> |

HINT: Consider

- If there is an in-depth description of the analysis process
- If thematic analysis is used. If so, is it clear how the categories/themes were derived from the data
- Whether the researcher explains how the data presented were selected from the original sample to demonstrate the analysis process
- If sufficient data are presented to support the findings
  - To what extent contradictory data are taken into account
- Whether the researcher critically examined their own role, potential bias and influence during analysis and selection of data for presentation

Comments:

9. Is there a clear statement of findings?

|            |                          |
|------------|--------------------------|
| Yes        | <input type="checkbox"/> |
| Can't Tell | <input type="checkbox"/> |
| No         | <input type="checkbox"/> |

HINT: Consider whether

- If the findings are explicit
- If there is adequate discussion of the evidence both for and against the researcher's arguments
- If the researcher has discussed the credibility of their findings (e.g. triangulation, respondent validation, more than one analyst)
- If the findings are discussed in relation to the original research question

Comments:



Section C: Will the results help locally?

medRxiv preprint doi: <https://doi.org/10.1101/2024.09.27.24314469>; this version posted September 30, 2024. The copyright holder for this preprint (which was not certified by peer review) is the author/funder, who has granted medRxiv a license to display the preprint in perpetuity.

10. How valuable is the research?  
It is made available under a [CC-BY 4.0 International license](https://creativecommons.org/licenses/by/4.0/).

**HINT: Consider**

- If the researcher discusses the contribution the study makes to existing knowledge or understanding (e.g. do they consider the findings in relation to current practice or policy, or relevant research-based literature
- If they identify new areas where research is necessary
- If the researchers have discussed whether or how the findings can be transferred to other populations or considered other ways the research may be used

Comments:
